# Supplementary material
Source: publisher figshare collection journal article supplement (https://acs.figshare.com/ndownloader/files/5674056)
Supplement: Supplementary file 1 [file 5674056]

# BIOCHEMISTRY

including biophysical chemistry & molecular biology

Biochemistry, 1998, 37(13), 4374-4387, DOI: [10.1021/bi9718292](https://doi.org/10.1021/bi9718292)

## Terms & Conditions

Electronic Supporting Information files are available without a subscription to ACS Web Editions. The American Chemical Society holds a copyright ownership interest in any copyrightable Supporting Information. Files available from the ACS website may be downloaded for personal use only. Users are not otherwise permitted to reproduce, republish, redistribute, or sell any Supporting Information from the ACS website, either in whole or in part, in either machine-readable form or any other form without permission from the American Chemical Society. For permission to reproduce, republish and redistribute this material, requesters must process their own requests via the RightsLink permission system. Information about how to use the RightsLink permission system can be found at <http://pubs.acs.org/page/copyright/permissions.html>

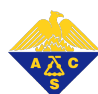

**ACS Publications**

MOST TRUSTED. MOST CITED. MOST READ.

Copyright © 1998 American Chemical Society

# An Intercalated and Thermally Stable FAPY Adduct of Aflatoxin B<sub>1</sub> in a DNA Duplex: Structural Refinement from <sup>1</sup>H NMR<sup>†</sup>

Hui Mao, Zhengwu Deng, Fang Wang, Thomas M. Harris, and Michael P. Stone<sup>†,\*</sup>

Department of Chemistry and Center in Molecular Toxicology,  
Vanderbilt University, Nashville, Tennessee 37235

## SUPPORTING INFORMATION

Stone, Michael P.:

(615) 322-2589

(615) 322-3141 (FAX)

mpstone@nmr2.cas.vanderbilt.edu

Running Title: Formamidopyrimidine Adduct of Aflatoxin B<sub>1</sub>

Keywords: DNA Adducts, Aflatoxin, DNA Conformation,  
NMR Spectroscopy, Structural Refinement

## Details of the MD refinement

Empirical base pairing distance and planarity restraints were used as follows. For G•C base pairs  $r[\text{cytosine N4-guanosine O6}] = 2.91 \pm 0.05 \text{ \AA}$ ,  $r[\text{cytosine N3-guanosine N1}] = 2.95 \pm 0.05 \text{ \AA}$ ,  $r[\text{cytosine O2-guanosine O6}] = 2.86 \pm 0.05 \text{ \AA}$ ,  $r[\text{cytosine N3-guanosine N2}] = 3.65 \pm 0.05 \text{ \AA}$ , and  $r[\text{cytosine O2-guanosine O6}] = 5.42 \pm 0.05 \text{ \AA}$ . For A•T base pairs  $r[\text{adenosine N6-thymidine O4}] = 2.95 \pm 0.05 \text{ \AA}$ ,  $r[\text{adenosine N1-thymidine N3}] = 2.82 \pm 0.05 \text{ \AA}$ ,  $r[\text{adenosine N1-thymidine O4}] = 3.63 \pm 0.05 \text{ \AA}$ , and  $r[\text{adenosine N6-thymidine O2}] = 5.40 \pm 0.05 \text{ \AA}$ . The value of the torsion angle for Watson-Crick base pairing was:  $[\text{purine C2-purine N1-pyrimidine N3-pyrimidine C2}] = 0 \pm 10^\circ$ . Empirical base-step distances were  $r[\text{H8-H8}] = 5.00 \pm 0.20 \text{ \AA}$ ,  $r[\text{H6-H6}] = 5.00 \pm 0.20 \text{ \AA}$ , and  $r[\text{H8-H6}] = 4.80 \pm 0.20 \text{ \AA}$ .

The NOE distances were partitioned into five classes based on the quality of the distances generated from MARDIGRAS. Different force constants were assigned for each class (50, 40, 30, 20, and 10 kcal mole<sup>-1</sup>Å<sup>-2</sup> for the best defined class to the worst defined class of NOE restraints, respectively). These include 388 NOE restraints in class 1, 103 restraints in class 2, 42 restraints in class 3, 34 restraints in class 4 and 15 restraints in class 5. Hydrogen bond restraints were included to ensure Watson-Crick base pairing based on the experimental observations. A force constant of 10 kcal mole<sup>-1</sup>Å<sup>-2</sup> was assigned to these restraints. The distances were as follows for all base pairs. For the G•C base pairs  $r[\text{C(N4) - G(O6)}] = 2.70 \pm 0.20 \text{ \AA}$ ,  $r[\text{C(N3) - G(N1)}] = 2.91 \pm 0.10 \text{ \AA}$ ,  $r[\text{C(O2) - G(N2)}] = 3.01 \pm 0.20 \text{ \AA}$ . For A•T base pairs  $r[\text{A(N6) - T(O4)}] = 2.80 \pm 0.20 \text{ \AA}$  AND  $r[\text{A(N1) - T(N3)}] = 2.95 \pm 0.10 \text{ \AA}$ . It was necessary to restrain backbone torsion angle to a region derived from canonical A- and B-form DNA [148,1285]. The ranges for the angles were 265-325° for  $\alpha$ , 160-220° for  $\beta$ , 27-57° for  $\gamma$ , 80-160° for  $\delta$ , 145-205° for  $\epsilon$ , 260-320° for  $\zeta$ , and 200-270° for  $\chi$ . A force constant of 10 kcal mole<sup>-1</sup>Å<sup>-2</sup> was assigned for base planarity restraints. A torsion angle restraint was added between each base pair with a range of  $\pm 10^\circ$  in order to prevent

excessive propeller twisting. These dihedral angle restraints were assigned a force constant of 10 kcal mole<sup>-1</sup>Å<sup>-2</sup>. In addition, sugar pucker restraints for B-DNA were included with a force constant of 10 kcal mole<sup>-1</sup>Å<sup>-2</sup>.

The system was coupled to a heating bath with a target temperature of 1500 K which was reached in a 3 ps interval. This temperature was maintained for 17 ps. The molecules were then cooled to 300 K in a 3 ps period and maintained at that temperature for 25 ps. Coordinate sets were archived every 0.1 ps, and 30 structures from the last 5 ps were averaged. The average MD structures were then subjected to 500 iterations of conjugate gradient energy minimization to obtain the final structures. The weights for the NOE restraints and the additional empirical restraints were modulated throughout the simulated annealing protocol by multiplying the corresponding force constants by scaling factors. Specifically, the force constants for the four classes of NOE restraints were scaled up for 3.5 ps during the heating period to 120, 100, 80, 60 and 40 kcal mole<sup>-1</sup>Å<sup>-2</sup> in the order of best to worst defined distances. These weights were maintained during the remainder of the heating period and for the first 2 ps of the equilibrium dynamics period, and were then scaled down to 50, 40, 30, 20 and 10 kcal mole<sup>-1</sup>Å<sup>-2</sup> in the order of best to worst defined restraints. The dihedral angle restraints and the base-pair distance restraints were also modulated throughout the MD calculation such that their force constants were scaled up to 100 kcal mole<sup>-1</sup>Å<sup>-2</sup> during the same period as for the NOE restraints and scaled back to 10 kcal mole<sup>-1</sup>Å<sup>-2</sup>, also at the same time as the NOE restraints.

Table 1S. Assignments of non-exchangeable protons of AFB<sub>1</sub>-FAPY modified oligonucleotide (25 °C).

| Nucleotide          | H5/CH <sub>3</sub> | H6/H8 | H1'  | H2'  | H2'' | H3'  | H4'  | H5', H5''  |
|---------------------|--------------------|-------|------|------|------|------|------|------------|
| C <sup>1</sup>      | 5.81               | 7.73  | 5.77 | 2.08 | 2.45 | 4.57 | 4.01 | 3.67       |
| T <sup>2</sup>      | 1.59               | 7.45  | 5.67 | 2.14 | 2.44 | 4.81 | 4.11 | 3.94, 3.97 |
| A <sup>3</sup>      |                    | 8.29  | 6.13 | 2.55 | 2.82 | 4.96 | 4.34 | 4.05, 4.10 |
| T <sup>4</sup>      | 1.44               | 7.27  | 5.91 | 2.27 | 2.55 | 4.84 | 4.23 | 4.09, 4.11 |
| FAPY G <sup>5</sup> |                    | 8.12  | 5.01 | 1.88 | 2.07 | 4.79 | 4.53 | 3.93, n.d. |
| A <sup>6</sup>      |                    | 8.12  | 6.19 | 2.56 | 2.82 | 4.98 | 4.38 | 3.97, 4.09 |
| T <sup>7</sup>      | 1.22               | 7.15  | 5.92 | 1.95 | 2.44 | 4.98 | 4.38 | 4.11, 4.18 |
| T <sup>8</sup>      | 1.52               | 7.28  | 5.98 | 1.94 | 2.33 | 4.78 | n.d. | 4.03, 4.17 |
| C <sup>9</sup>      | 5.66               | 7.40  | 5.66 | 1.92 | 2.30 | 4.73 | 4.04 | 3.93, 3.98 |
| A <sup>10</sup>     |                    | 8.17  | 6.24 | 2.35 | 2.59 | 4.62 | 4.11 | 3.98, 4.02 |
| T <sup>11</sup>     | 1.64               | 7.24  | 5.69 | 2.06 | 2.21 | 4.50 | 3.92 | 3.55, n.d. |
| G <sup>12</sup>     |                    | 7.86  | 5.28 | 2.61 | 2.68 | 4.87 | 4.20 | 3.84, 3.92 |
| A <sup>13</sup>     |                    | 8.10  | 5.89 | 2.67 | 2.78 | 4.97 | 4.37 | 3.97, 4.41 |
| A <sup>14</sup>     |                    | 7.98  | 6.08 | 2.43 | 2.75 | 4.83 | 4.35 | 4.12, 4.17 |
| T <sup>15</sup>     | 1.10               | 6.92  | 5.75 | 1.88 | 2.39 | 4.68 | 4.17 | 4.04, 3.55 |
| C <sup>16</sup>     | 5.42               | 7.31  | 5.81 | 2.16 | 2.24 | 4.73 | 4.13 | 3.96, 3.98 |
| A <sup>17</sup>     |                    | 8.29  | 6.01 | 2.61 | 2.80 | 4.85 | 4.26 | 3.95, 4.04 |
| T <sup>18</sup>     | 1.30               | 7.20  | 5.45 | 1.94 | 2.24 | n.d. | 4.12 | 3.98, 4.12 |
| A <sup>19</sup>     |                    | 8.09  | 6.01 | 2.72 | 2.64 | 4.95 | 4.33 | 4.17, 4.12 |
| G <sup>20</sup>     |                    | 7.61  | 5.90 | 2.16 | 2.33 | 4.55 | 4.17 | 4.04, 4.09 |

Table 2S. Assignments of the non-exchangeable protons of the unmodified oligonucleotide. (25 °C).

| Nucleotide      | H5/CH <sub>3</sub> | H6/H8 | H1'  | H2'  | H2'' | H3'  | H4'  | H5', H5''  |
|-----------------|--------------------|-------|------|------|------|------|------|------------|
| C <sup>1</sup>  | 5.62               | 7.57  | 5.56 | 1.95 | 2.29 | n.d. | 4.39 | 3.82, 3.52 |
| T <sup>2</sup>  | 1.44               | 7.36  | 5.50 | 2.03 | 2.34 | n.d. | 4.39 | 3.96, 3.82 |
| A <sup>3</sup>  |                    | 8.14  | 6.02 | 2.46 | 2.69 | 4.79 | 4.19 | 3.95, 3.89 |
| T <sup>4</sup>  | 1.15               | 6.84  | 5.38 | 1.69 | 2.10 | n.d. | n.d. | n.d.       |
| G <sup>5</sup>  |                    | 7.59  | 5.35 | 2.43 | 2.51 | 4.75 | 4.10 | n.d.       |
| A <sup>6</sup>  |                    | 7.92  | 5.96 | 2.40 | 2.67 | 4.75 | 4.22 | 3.89, 3.85 |
| T <sup>7</sup>  | 1.03               | 6.94  | 5.69 | 1.74 | 2.29 | n.d. | 4.57 | 3.96, 3.92 |
| T <sup>8</sup>  | 1.33               | 7.13  | 5.82 | 1.79 | 2.19 | n.d. | n.d. | n.d.       |
| C <sup>9</sup>  | 5.46               | 7.24  | 5.45 | 1.76 | 2.04 | 4.57 | n.d. | n.d.       |
| A <sup>10</sup> |                    | 8.02  | 6.07 | 2.20 | 2.46 | n.d. | 4.46 | 3.95, 3.83 |
| T <sup>11</sup> | 1.35               | 7.09  | 5.49 | 1.19 | 1.93 | n.d. | n.d. | n.d.       |
| G <sup>12</sup> |                    | 7.70  | 5.08 | 2.46 | 2.51 | 4.71 | n.d. | n.d.       |
| A <sup>13</sup> |                    | 7.96  | 5.73 | 2.52 | 2.66 | 4.82 | 4.21 | n.d.       |
| A <sup>14</sup> |                    | 7.92  | 5.94 | 2.31 | 2.66 | 4.75 | 4.22 | n.d.       |
| T <sup>15</sup> | 1.04               | 6.84  | 5.59 | 1.75 | 2.20 | n.d. | n.d. | n.d.       |
| C <sup>16</sup> | 5.32               | 7.24  | 5.38 | 1.85 | 2.19 | n.d. | n.d. | n.d.       |
| A <sup>17</sup> |                    | 8.06  | 5.92 | 2.41 | 2.64 | 4.75 | 4.15 | 3.90, 3.85 |
| T <sup>18</sup> | 1.20               | 6.92  | 5.25 | 1.69 | 2.02 | n.d. | 4.56 | n.d.       |
| A <sup>19</sup> |                    | 7.90  | 5.79 | 2.41 | 2.60 | 4.75 | 4.13 | 3.81, 3.81 |
| G <sup>20</sup> |                    | 7.42  | 5.72 | 1.99 | 2.15 | 4.75 | 4.36 | 3.87, 3.87 |

Table 3S. Assignments of the exchangeable protons of AFB<sub>1</sub>-FAPY modified and unmodified oligonucleotides. (5 °C)

| Nucleotide                         | Protons          | $\delta$ (Unmodified)<br>(ppm) | $\delta$ (Modified)<br>(ppm) | $\Delta\delta$ (ppm) |
|------------------------------------|------------------|--------------------------------|------------------------------|----------------------|
| C <sup>1</sup>                     | N4H <sub>b</sub> | 7.73                           | 7.68                         | 0.05                 |
|                                    | N4H <sub>a</sub> | 7.22                           | 7.24                         | 0.02                 |
| T <sup>2</sup>                     | N3H              | 13.6                           | 13.6                         | 0.00                 |
| A <sup>3</sup>                     | N2H <sub>a</sub> | 6.38                           | 6.41                         | 0.03                 |
|                                    | N2H <sub>b</sub> | 7.58                           | 7.67                         | 0.09                 |
| T <sup>4</sup>                     | N3H              | 13.6                           | 13.2                         | -0.40                |
| G <sup>5</sup> /FAPYG <sup>5</sup> | N1H              | 12.2                           | 12.1                         | -0.04                |
| A <sup>6</sup>                     | N2H <sub>a</sub> | 5.85                           | 6.55                         | 0.70                 |
|                                    | N2H <sub>b</sub> | 7.56                           | 7.68                         | 0.12                 |
| T <sup>7</sup>                     | N3H              | 13.7                           | 13.81                        | 0.14                 |
| T <sup>8</sup>                     | N3H              | 13.8                           | 13.8                         | 0.00                 |
| C <sup>9</sup>                     | N4H <sub>a</sub> | 7.05                           | 7.07                         | 0.02                 |
|                                    | N4H <sub>b</sub> | 8.41                           | 7.98                         | -0.42                |
| G <sup>12</sup>                    | N1H              | 12.6                           | 12.6                         | -0.02                |
| A <sup>13</sup>                    | N2H <sub>a</sub> | 5.92                           | 5.96                         | 0.04                 |
|                                    | N2H <sub>b</sub> | 7.56                           | 7.67                         | 0.11                 |
| A <sup>14</sup>                    | N2H <sub>a</sub> | 5.99                           | 6.00                         | 0.01                 |
|                                    | N2H <sub>b</sub> | 7.58                           | 7.65                         | 0.07                 |
| T <sup>15</sup>                    | N3H              | 13.4                           | 13.3                         | -0.14                |
| C <sup>16</sup>                    | N4H <sub>a</sub> | 6.66                           | 6.83                         | 0.17                 |
|                                    | N4H <sub>b</sub> | 8.22                           | 8.23                         | 0.01                 |
| A <sup>17</sup>                    | N2H <sub>a</sub> | 6.21                           | 6.75                         | 0.54                 |
|                                    | N2H <sub>b</sub> | 7.60                           | 7.56                         | -0.04                |
| T <sup>18</sup>                    | N3H              | 13.4                           | 13.3                         | -0.10                |
| A <sup>19</sup>                    | N2H <sub>a</sub> | 6.36                           | 6.42                         | 0.06                 |
|                                    | N2H <sub>b</sub> | 7.72                           | 7.71                         | -0.01                |
| G <sup>20</sup>                    | N1H              | 12.6                           | 12.6                         | 0.0                  |

**Table 4S.** Partial charges for the atoms of the AFB<sub>1</sub>-FAPY lesion <sup>FAPY</sup>G<sup>5</sup>.

|    | Atom Name | Atom Type <sup>1</sup> | Partial Charge <sup>2</sup> |
|----|-----------|------------------------|-----------------------------|
| 1  | P         | P                      | 1.076                       |
| 2  | O1P       | O2                     | -0.514                      |
| 3  | O2P       | O2                     | -0.45                       |
| 4  | O5'       | OS                     | -0.362                      |
| 5  | C5'       | C2                     | 0.16                        |
| 6  | H5'       | H                      | 0.009                       |
| 7  | H5''      | H                      | -0.001                      |
| 8  | C4'       | CH                     | 0.067                       |
| 9  | H4'       | H                      | 0.048                       |
| 10 | O4'       | OS                     | -0.347                      |
| 11 | C1'       | CH                     | 0.273                       |
| 12 | H1'       | H                      | 0.058                       |
| 13 | N9        | NS                     | -0.206                      |
| 14 | HN9       | H                      | 0.156                       |
| 15 | C4        | CB                     | 0.111                       |
| 16 | N3        | NC                     | -0.324                      |
| 17 | C2        | CA                     | 0.382                       |
| 18 | N2        | N2                     | -0.359                      |
| 19 | H21       | H2                     | 0.236                       |
| 20 | H22       | H2                     | 0.208                       |
| 21 | N1        | NA                     | -0.379                      |
| 22 | H1        | H                      | 0.203                       |
| 23 | C6        | C                      | 0.436                       |
| 24 | O6        | O                      | -0.328                      |
| 25 | C5        | CB                     | -0.252                      |
| 26 | N7        | NT                     | -0.179                      |
| 27 | C8        | CO                     | 0.046                       |
| 28 | O8        | OA                     | -0.53                       |
| 29 | H8        | H                      | 0.201                       |



|    |     |     |        |
|----|-----|-----|--------|
| 30 | C8A | CTA | 0.191  |
| 31 | H8A | H   | 0.051  |
| 32 | C9  | CTA | 0.053  |
| 33 | H9  | H   | 0.083  |
| 34 | O9  | OH  | -0.288 |

---



---

|    | Atom Name | Atom Type | Partial Charge |
|----|-----------|-----------|----------------|
| 37 | H9A       | H         | 0.074          |
| 38 | C9B       | CBA       | -0.255         |
| 39 | O7        | OJ        | -0.253         |
| 40 | C6A       | CTA       | 0.221          |
| 41 | H6A       | H         | 0.056          |
| 42 | O6A       | OJ        | -0.212         |
| 43 | C5A       | CBA       | 0.219          |
| 44 | C5B       | CAA       | -0.139         |
| 45 | H5B       | H         | -0.089         |
| 46 | C4B       | CBA       | 0.111          |
| 47 | O4        | OSA       | -0.305         |
| 48 | CM        | CTA       | 0.201          |
| 49 | HM1       | H         | 0.022          |
| 50 | HM2       | H         | 0.021          |
| 51 | HM3       | H         | 0.022          |
| 52 | C4A       | CBA       | -0.251         |
| 53 | C10A      | CBA       | 0.273          |
| 54 | O10       | OJ        | -0.261         |
| 55 | C11       | CO        | 0.421          |
| 56 | O11       | OA        | -0.26          |
| 57 | C11A      | CBA       | -0.332         |
| 58 | C3A       | CBA       | 0.176          |
| 59 | C3        | CTA       | -0.005         |
| 60 | H31       | H         | 0.049          |
| 61 | H32       | H         | 0.021          |
| 62 | C2A       | CTA       | -0.083         |

|    |      |    |        |
|----|------|----|--------|
| 63 | H21  | H  | 0.025  |
| 64 | H22  | H  | 0.017  |
| 65 | C1   | CO | 0.311  |
| 66 | O1   | OA | -0.263 |
| 67 | C2'  | CH | 0.115  |
| 68 | H2'' | H  | 0.035  |
| 69 | O2'  | OH | -0.4   |
| 70 | H2'  | HO | 0.25   |
| 71 | C3'  | CH | 0.219  |
| 72 | H3'  | H  | 0.007  |
| 73 | O3'  | OS | -0.79  |

---

<sup>1</sup>Atom types for <sup>FAPY</sup>G<sup>5</sup> were assigned using the standard atom type in the CHARMM (v.2.2) force field.

<sup>2</sup>Partial charges were obtained from MOPAC calculation with a total charge of -1 assigned for the nucleotide.

<sup>3</sup>Atoms which were defined within a group in the residue topology file are separated by space.

Figure 1S. The atom names defined for the atoms of the <sup>FAPY</sup>G<sup>5</sup> nucleotide.

Figure 2S. Stereoviews of the starting structures for the MD simulation/annealing structural refinement (A) iniB was generated from B-form DNA, (B) iniA was generated from A-form DNA.

---



**A**

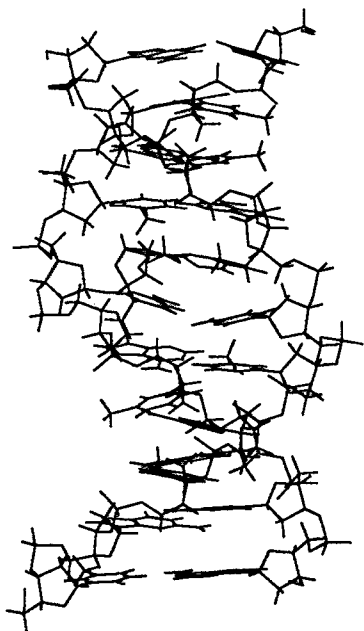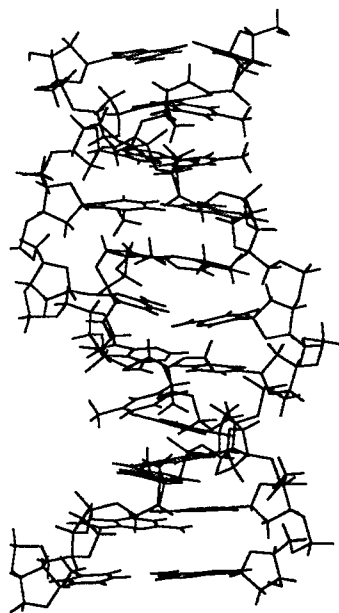

**Ini B**

**B**

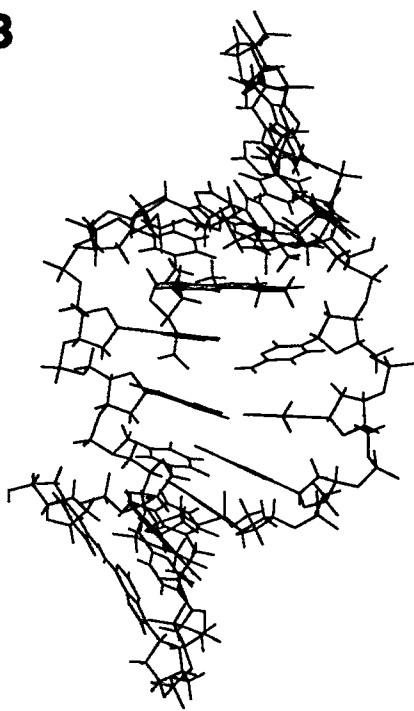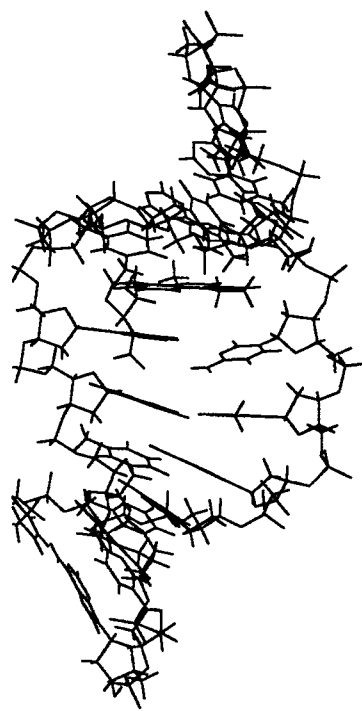

**Ini A**
